# Supplementary material
Source: PubMed Central journal article supplement (PMC5111672)
Supplement: pnas.1521540113.sd01.pdf [file pnas.1521540113.sd01.pdf]

**Dataset 1: Observational discharge and catch data from forty basins around the world used to establish the algorithm for distributing FAO-reported catches among grid cells within nations.**

| Continent | River              | Discharge (cms) | Catch (Tonnes/year) | Catch data reference |
|-----------|--------------------|-----------------|---------------------|----------------------|
| Africa    | Bandama            | 623             | 3,408               | *                    |
| Africa    | Benue              | 4,375           | 12,570              | *                    |
| Africa    | Comoe              | 546             | 2,142               | *                    |
| Africa    | Gambia             | 701             | 3,000               | *                    |
| Africa    | Mono               | 184             | 533                 | *                    |
| Africa    | Niger              | 5,061           | 30,000              | *                    |
| Africa    | Nile               | 10,504          | 40,840              | *                    |
| Africa    | Oueme              | 221             | 646                 | *                    |
| Africa    | Pendjari           | 135             | 140                 | *                    |
| Africa    | Rufigi/Ruaha       | 1,763           | 3,600               | *                    |
| Africa    | Sassandra          | 1,123           | 1,518               | *                    |
| Africa    | Senegal            | 1,112           | 16,000              | *                    |
| Africa    | Tana               | 368             | 500                 | *                    |
| Africa    | Volta Black        | 267             | 1,560               | *                    |
| Africa    | Volta Red          | 41              | 370                 | *                    |
| Africa    | Volta White        | 32              | 70                  | *                    |
| Africa    | Zaire              | 40,533          | 82,000              | *                    |
| Africa    | Zambezi            | 9,734           | 21,000              | *                    |
| Asia      | Amur               | 10,900          | 101,200             | †                    |
| Asia      | Dnieper            | 1,700           | 5,000               | ‡                    |
| Asia      | Dniester           | 366             | 1,180               | ‡                    |
| Asia      | Ganges/Brahmaputra | 18,601          | 727,000             | §                    |
| Asia      | Mekong             | 15,900          | 2,642,000           | ¶                    |
| Asia      | Ob-Irtysh          | 12,800          | 46,500              | #                    |
| Asia      | Sepik              | 7,500           | 2,141               | §                    |
| Asia      | Yangtze            | 29,460          | 350,000             | //                   |
| Europe    | Danube             | 6,450           | 26,253              | **                   |
| Europe    | Rhone              | 1,900           | 272                 | ††                   |
| N America | Mississippi        | 18,400          | 30,000              | ‡‡                   |
| S America | Amazon             | 201,804         | 450,000             | §§                   |
| S America | Araguari           | 2,093           | 2,000               | §                    |
| S America | Atrato             | 2,918           | 220                 | §                    |
| S America | Catatumbo          | 470             | 224                 | §                    |
| S America | Cuiaba             | 587             | 5,437               | §                    |
| S America | Magdalena          | 7,500           | 43,932              | §                    |
| S America | Orinoco            | 32,912          | 14,752              | §                    |

| Continent | River         | Discharge (cms) | Catch (Tonnes/year) | Catch data reference |
|-----------|---------------|-----------------|---------------------|----------------------|
| S America | Parana        | 13,500          | 3,679               | §                    |
| S America | Sao Francisco | 3,589           | 2,167               | §                    |
| S America | Tocantins     | 4,400           | 4,500               | §                    |
| S America | Uruguay       | 4,450           | 2,560               | §                    |

### Footnotes

\* Welcomme RL (1985) *River fisheries*, FAO Fisheries Technical Paper 262, 330 pp.

† Novomodny G, Sharov P, Zolotukhin S (2004) *Amur fish: wealth and crisis*. WWF RFE, Vladivostok, Russia. Apelsin Co., Ltd.

‡ Greze VN, Polikarpov GG, Romanenko VD (1987) *Nature of the Ukraine seas and internal waters*. Kiev, Naukova Dumka. 224 pp.

§ Payne AI, Crombie J, Halls AS, Temple SA (1993) *Synthesis of simple predictive models for tropical river fisheries*. Fisheries Management Science Programme, Overseas Development Administration, London, 85pp.

¶ van Zalinge N, Degen P, Pongsri C, Nuov S, Jensen JG, Nguyen VH, Choulamany X (2003) *The Mekong River System*. Proceedings of the Second International Symposium on the Management of Large Rivers For Fisheries.

# Gundrizer AN, loganzen BG, Kirillov FN (1989) Major problems in the development of the fishing industry in northern Siberia. *Polar Geography* 13(2), 111-118.

|| Chen D, Duan X, Liu S, Shi W (2003) *Status and Management of Fishery Resources of the Yangtze River*. Proceedings of the Second International Symposium on the Management of Large Rivers for Fisheries.

\*\* Bacalbasa-Dobrovici N (1989) *The Danube River and its fisheries*. Proceedings of the international large rivers symposium, ed. David Dodge.

†† Changeux T, Zylberblat M (1993) Analysis of fishing gear fishery statistics in the Rhone River basin: Part one: Study of the catch. *Bulletin Francais de la Peche et de la Pisciculture*. 0(330):271-294.

‡‡ Risotto SP, Turner ER (1985) Annual Fluctuation in Abundance of the Commercial Fisheries of the Mississippi River and Tributaries. *North American Journal of Fisheries Management* 5:557-574.

§§ Junk J, Soares M, Gercilia M, Bayley P (2007) Freshwater fishes of the Amazon River basin: their biodiversity, fisheries, and habitats. *Aquatic Ecosystem Health & Management* 10(2):153-173.
