# Supplementary material
Source: PubMed Central journal article supplement (PMC5111672)
Supplement: pnas.1521540113.sd02.pdf [file pnas.1521540113.sd02.pdf]

| ECOREGION                          | Ecoregion ID | Continent | Summed Catch<br>(T yr <sup>-1</sup> ) | Mean Temp <sup>+</sup><br>(Degrees C) | Mean Radiation <sup>+</sup><br>(Watts m <sup>-2</sup> ) | Summed Population <sup>‡</sup><br>(Persons km <sup>-2</sup> ) | Mean NPP <sup>§</sup><br>(Kg-C m <sup>-2</sup> year <sup>-1</sup> ) | Ecoregion Area <sup>¶</sup><br>(km <sup>2</sup> ) | Total Species Richness <sup>¶</sup> | Mean Latitude<br>(Degree) | Summed Mean Annual Discharge<br>(km <sup>3</sup> yr <sup>-1</sup> ) |
|------------------------------------|--------------|-----------|---------------------------------------|---------------------------------------|---------------------------------------------------------|---------------------------------------------------------------|---------------------------------------------------------------------|---------------------------------------------------|-------------------------------------|---------------------------|---------------------------------------------------------------------|
| Cuanza                             | 551          | Africa    | 2,108.2                               | 21.5                                  | 58.8                                                    | 13,245,300                                                    | 0.440                                                               | 332,728.8                                         | 77                                  | -10.76                    | 4677.4                                                              |
| Upper Niger                        | 507          | Africa    | 23,782.6                              | 26.6                                  | 61.4                                                    | 15,026,700                                                    | 0.429                                                               | 299,964.2                                         | 154                                 | 11.42                     | 4897.8                                                              |
| Zambeian Lowveld                   | 576          | Africa    | 1,843.4                               | 22.1                                  | 17.6                                                    | 24,077,100                                                    | 0.303                                                               | 519,495.9                                         | 137                                 | -23.00                    | 3715.4                                                              |
| Sangha                             | 534          | Africa    | 6,795.5                               | 24.2                                  | 75.1                                                    | 2,376,140                                                     | 0.944                                                               | 282,605.9                                         | 171                                 | 1.56                      | 5495.4                                                              |
| Inner Niger Delta                  | 508          | Africa    | 35,795.1                              | 28.8                                  | 21.2                                                    | 3,636,660                                                     | 0.103                                                               | 147,214.9                                         | 111                                 | 15.44                     | 4677.4                                                              |
| Zambeian Headwaters                | 555          | Africa    | 7,034.8                               | 20.8                                  | 58.8                                                    | 8,856,770                                                     | 0.481                                                               | 562,923.8                                         | 111                                 | -13.59                    | 7943.3                                                              |
| Uele                               | 536          | Africa    | 2,843.8                               | 24.4                                  | 85.2                                                    | 4,175,270                                                     | 0.940                                                               | 183,569.7                                         | 148                                 | 3.86                      | 6309.6                                                              |
| Coastal East Africa                | 564          | Africa    | 11,560.4                              | 23.5                                  | 39.4                                                    | 33,424,100                                                    | 0.441                                                               | 746,127.3                                         | 115                                 | -11.35                    | 8511.4                                                              |
| Bangweulu - Mweru                  | 544          | Africa    | 11,174.5                              | 21.1                                  | 60.5                                                    | 5,935,240                                                     | 0.594                                                               | 214,560.6                                         | 115                                 | -10.75                    | 7413.1                                                              |
| Tumba                              | 538          | Africa    | 2,382.5                               | 25.1                                  | 81.9                                                    | 445,544                                                       | 1.023                                                               | 10,020.6                                          | 50                                  | -0.74                     | 3801.9                                                              |
| Upper Zambezi Floodplains          | 556          | Africa    | 12,581.3                              | 22.1                                  | 47.6                                                    | 1,634,290                                                     | 0.330                                                               | 243,788.6                                         | 96                                  | -16.42                    | 7413.1                                                              |
| Ogooue - Nyanga - Kouilou - Niari  | 532          | Africa    | 9,290.9                               | 24.8                                  | 52.4                                                    | 5,938,300                                                     | 0.852                                                               | 286,056.4                                         | 249                                 | -2.15                     | 11220.2                                                             |
| Niger Delta                        | 506          | Africa    | 42,421.7                              | 26.3                                  | 59.9                                                    | 25,570,800                                                    | 0.851                                                               | 47,226.9                                          | 148                                 | 5.23                      | 7585.8                                                              |
| Upper Congo Rapids                 | 539          | Africa    | 3,961.7                               | 24.6                                  | 79.8                                                    | 898,491                                                       | 1.057                                                               | 11,268.8                                          | 177                                 | 0.53                      | 7762.5                                                              |
| Nile Delta                         | 524          | Africa    | 36,995.4                              | 20.6                                  | -6.3                                                    | 65,949,000                                                    | 0.063                                                               | 56,430.9                                          | 30                                  | 30.48                     | 9549.9                                                              |
| Lower Zambezi                      | 561          | Africa    | 16,986.6                              | 23.8                                  | 31.4                                                    | 6,438,770                                                     | 0.329                                                               | 129,887.6                                         | 76                                  | -16.20                    | 17378.0                                                             |
| Kasai                              | 546          | Africa    | 10,167.0                              | 23.7                                  | 72.8                                                    | 28,891,400                                                    | 0.832                                                               | 867,329.1                                         | 237                                 | -6.72                     | 30199.5                                                             |
| Middle Zambezi - Luangwa           | 558          | Africa    | 32,570.6                              | 22.3                                  | 41.5                                                    | 8,042,720                                                     | 0.382                                                               | 293,573.6                                         | 55                                  | -14.63                    | 28840.3                                                             |
| Lower Congo                        | 550          | Africa    | 15,819.5                              | 23.6                                  | 59.4                                                    | 3,470,620                                                     | 0.759                                                               | 52,432.5                                          | 208                                 | -5.84                     | 19498.4                                                             |
| Upper Congo                        | 540          | Africa    | 15,833.2                              | 24.4                                  | 74.5                                                    | 7,991,400                                                     | 0.890                                                               | 416,382.8                                         | 190                                 | -3.56                     | 35481.3                                                             |
| Lower Niger - Benue                | 505          | Africa    | 243,888.0                             | 27.1                                  | 52.0                                                    | 104,654,000                                                   | 0.468                                                               | 1,105,202.4                                       | 212                                 | 10.51                     | 45708.8                                                             |
| Upper Nile                         | 522          | Africa    | 80,128.2                              | 27.1                                  | 56.7                                                    | 39,553,700                                                    | 0.347                                                               | 1,253,186.2                                       | 120                                 | 9.07                      | 50118.7                                                             |
| Cuvette Centrale                   | 537          | Africa    | 25,160.0                              | 24.6                                  | 82.2                                                    | 14,784,000                                                    | 1.043                                                               | 554,192.1                                         | 242                                 | 0.86                      | 50118.7                                                             |
| Lower Congo Rapids                 | 549          | Africa    | 36,354.4                              | 24.0                                  | 54.1                                                    | 6,112,220                                                     | 0.686                                                               | 17,443.8                                          | 170                                 | -4.88                     | 48977.9                                                             |
| Sudanic Congo - Oubangi            | 535          | Africa    | 60,200.3                              | 24.8                                  | 83.6                                                    | 8,209,350                                                     | 0.778                                                               | 540,279.0                                         | 173                                 | 4.22                      | 91201.1                                                             |
| Lower Nile                         | 523          | Africa    | 225,989.0                             | 26.5                                  | 2.6                                                     | 45,117,000                                                    | 0.028                                                               | 1,124,109.0                                       | 72                                  | 19.00                     | 120226.4                                                            |
| Baluchistan                        | 701          | Asia      | 0.5                                   | 22.3                                  | 4.8                                                     | 8,763,750                                                     | 0.022                                                               | 460,053.1                                         | 130                                 | 27.73                     | 3.4                                                                 |
| Yaghistan                          | 704          | Asia      | 17.8                                  | 13.8                                  | 6.4                                                     | 4,838,990                                                     | 0.241                                                               | 59,273.9                                          | 26                                  | 32.14                     | 15.5                                                                |
| Irgyz -Turgai                      | 601          | Asia      | 58.1                                  | 5.6                                   | -35.0                                                   | 248,712                                                       | 0.078                                                               | 233,245.7                                         | 9                                   | 49.47                     | 36.3                                                                |
| Inner Mongolia Endorheic Basins    | 621          | Asia      | 38.9                                  | 4.0                                   | -10.0                                                   | 7,418,210                                                     | 0.052                                                               | 1,078,314.3                                       | 20                                  | 42.79                     | 64.6                                                                |
| Dzungaria                          | 623          | Asia      | 47.9                                  | 5.6                                   | -7.9                                                    | 10,209,600                                                    | 0.072                                                               | 526,711.3                                         | 5                                   | 43.92                     | 66.1                                                                |
| Chuya                              | 604          | Asia      | 7.3                                   | -4.2                                  | -31.8                                                   | 19,881                                                        | 0.306                                                               | 26,427.0                                          | 6                                   | 50.02                     | 66.1                                                                |
| Qaidan                             | 632          | Asia      | 190.7                                 | -0.7                                  | 10.8                                                    | 416,486                                                       | 0.005                                                               | 284,123.0                                         | 10                                  | 37.10                     | 182.0                                                               |
| Eastern Gulf of Thailand Drainages | 731          | Asia      | 735.3                                 | 27.0                                  | 72.3                                                    | 3,697,700                                                     | 0.834                                                               | 33,327.8                                          | 78                                  | 11.78                     | 223.9                                                               |
| Liao He                            | 637          | Asia      | 329.0                                 | 6.5                                   | -8.6                                                    | 51,466,700                                                    | 0.349                                                               | 271,215.6                                         | 107                                 | 42.39                     | 295.1                                                               |
| Western Mongolia                   | 622          | Asia      | 62.7                                  | -1.9                                  | -17.9                                                   | 534,024                                                       | 0.133                                                               | 472,446.5                                         | 7                                   | 47.40                     | 354.8                                                               |
| Upper Irtysh                       | 603          | Asia      | 1,036.5                               | 2.1                                   | -27.8                                                   | 879,006                                                       | 0.159                                                               | 255,456.6                                         | 26                                  | 47.33                     | 371.5                                                               |
| Southeastern Korean Peninsula      | 639          | Asia      | 1,940.1                               | 11.4                                  | 5.9                                                     | 16,969,500                                                    | 0.766                                                               | 52,253.5                                          | 54                                  | 35.65                     | 380.2                                                               |
| Okhotsk Coast                      | 614          | Asia      | 64.3                                  | -8.9                                  | -63.0                                                   | 57,846                                                        | 0.278                                                               | 248,868.6                                         | 29                                  | 60.09                     | 549.5                                                               |
| Balkash - Alakul                   | 624          | Asia      | 1,385.5                               | 5.1                                   | -21.7                                                   | 5,530,590                                                     | 0.183                                                               | 482,638.7                                         | 15                                  | 45.64                     | 537.0                                                               |
| Hamgyong - Sanmaek                 | 640          | Asia      | 1,765.3                               | 3.6                                   | -4.8                                                    | 8,855,780                                                     | 0.568                                                               | 83,496.4                                          | 15                                  | 41.49                     | 501.2                                                               |
| Coastal Amur                       | 615          | Asia      | 80.6                                  | -5.5                                  | -40.3                                                   | 13,787                                                        | 0.344                                                               | 110,579.6                                         | 68                                  | 54.02                     | 489.8                                                               |
| Southern Annam                     | 730          | Asia      | 1,900.3                               | 23.7                                  | 53.9                                                    | 16,705,000                                                    | 0.992                                                               | 77,269.3                                          | 70                                  | 14.00                     | 602.6                                                               |
| Helmand - Sistan                   | 702          | Asia      | 158.7                                 | 15.9                                  | -4.9                                                    | 11,682,800                                                    | 0.041                                                               | 363,775.5                                         | 22                                  | 31.93                     | 707.9                                                               |
| Western Ghats                      | 715          | Asia      | 1,922.9                               | 26.0                                  | 55.5                                                    | 108,589,000                                                   | 0.666                                                               | 150,597.5                                         | 290                                 | 14.06                     | 933.3                                                               |
| Koryakia                           | 612          | Asia      | 131.7                                 | -7.3                                  | -72.1                                                   | 10,235                                                        | 0.292                                                               | 259,276.7                                         | 32                                  | 61.33                     | 891.3                                                               |
| Mae Khlong                         | 733          | Asia      | 5,690.0                               | 25.0                                  | 66.0                                                    | 4,837,110                                                     | 0.759                                                               | 43,012.8                                          | 130                                 | 14.17                     | 691.8                                                               |

| ECOREGION                           | Ecoregion ID | Continent | Summed Catch<br>(T yr <sup>-1</sup> ) | Mean Temp <sup>*</sup><br>(Degrees C) | Mean Radiation <sup>†</sup><br>(Watts m <sup>-2</sup> ) | Summed Population <sup>‡</sup><br>(Persons km <sup>-2</sup> ) | Mean NPP <sup>§</sup><br>(Kg-C m <sup>-2</sup> year <sup>-1</sup> ) | Ecoregion Area <sup>¶</sup><br>(km <sup>2</sup> ) | Total Species Richness <sup>  </sup> | Mean Latitude<br>(Degree) | Summed Mean Annual Discharge<br>(km <sup>3</sup> yr <sup>-1</sup> ) |
|-------------------------------------|--------------|-----------|---------------------------------------|---------------------------------------|---------------------------------------------------------|---------------------------------------------------------------|---------------------------------------------------------------------|---------------------------------------------------|--------------------------------------|---------------------------|---------------------------------------------------------------------|
| Argun                               | 618          | Asia      | 628.7                                 | -2.1                                  | -21.6                                                   | 1,516,620                                                     | 0.231                                                               | 344,384.9                                         | 39                                   | 49.12                     | 871.0                                                               |
| Tibetan Plateau Endorheic Drainages | 707          | Asia      | 1,440.2                               | -4.5                                  | 26.5                                                    | 336,089                                                       | 0.252                                                               | 611,734.2                                         | 39                                   | 33.17                     | 1318.3                                                              |
| Northern Annam                      | 760          | Asia      | 2,902.2                               | 23.2                                  | 24.7                                                    | 8,060,520                                                     | 0.904                                                               | 37,656.5                                          | 86                                   | 19.04                     | 758.6                                                               |
| Shilka (Amur)                       | 619          | Asia      | 185.7                                 | -3.6                                  | -21.5                                                   | 610,995                                                       | 0.371                                                               | 232,031.7                                         | 40                                   | 51.04                     | 1000.0                                                              |
| Southeastern Ghats                  | 716          | Asia      | 3,575.9                               | 26.6                                  | 65.3                                                    | 101,148,000                                                   | 0.364                                                               | 165,377.1                                         | 163                                  | 11.63                     | 1071.5                                                              |
| Upper Indus                         | 706          | Asia      | 3,868.4                               | -2.6                                  | 13.7                                                    | 1,306,950                                                     | 0.295                                                               | 181,228.6                                         | 62                                   | 33.18                     | 1318.3                                                              |
| Kamchatka & Northern Kurils         | 613          | Asia      | 245.1                                 | -1.9                                  | -55.8                                                   | 194,831                                                       | 0.309                                                               | 209,556.2                                         | 48                                   | 54.95                     | 1380.4                                                              |
| Northern Central Asian Highlands    | 628          | Asia      | 539.2                                 | 5.9                                   | -10.4                                                   | 14,869,400                                                    | 0.260                                                               | 208,630.4                                         | 41                                   | 41.55                     | 1412.5                                                              |
| Anadyr                              | 610          | Asia      | 305.4                                 | -10.0                                 | -84.1                                                   | 14,344                                                        | 0.256                                                               | 312,444.5                                         | 33                                   | 64.72                     | 1621.8                                                              |
| Eastern Yellow Sea Drainages        | 638          | Asia      | 9,200.5                               | 8.1                                   | -5.4                                                    | 55,433,800                                                    | 0.660                                                               | 141,430.6                                         | 104                                  | 39.00                     | 1659.6                                                              |
| Malay Peninsula Eastern Slope       | 734          | Asia      | 2,843.1                               | 26.2                                  | 79.0                                                    | 22,995,200                                                    | 1.024                                                               | 145,764.3                                         | 317                                  | 5.57                      | 1862.1                                                              |
| Coastal Fujian - Zeijang            | 767          | Asia      | 3,805.4                               | 18.2                                  | 2.7                                                     | 90,260,400                                                    | 0.975                                                               | 193,038.7                                         | 181                                  | 26.23                     | 2089.3                                                              |
| Chao Phraya                         | 732          | Asia      | 18,215.9                              | 26.3                                  | 52.4                                                    | 37,115,300                                                    | 0.590                                                               | 173,712.4                                         | 281                                  | 16.54                     | 2138.0                                                              |
| Tarim                               | 625          | Asia      | 4,610.7                               | 5.2                                   | -2.5                                                    | 11,118,100                                                    | 0.087                                                               | 1,138,804.9                                       | 24                                   | 39.13                     | 2691.5                                                              |
| Upper Huang He                      | 633          | Asia      | 4,943.1                               | -2.2                                  | 20.2                                                    | 858,608                                                       | 0.173                                                               | 176,732.2                                         | 21                                   | 35.04                     | 2344.2                                                              |
| Upper Huang He Corridor             | 634          | Asia      | 5,702.5                               | 2.9                                   | 12.5                                                    | 14,485,900                                                    | 0.338                                                               | 116,933.8                                         | 8                                    | 36.10                     | 2290.9                                                              |
| Indus Himalayan Foothills           | 705          | Asia      | 12,264.3                              | 6.7                                   | 4.0                                                     | 42,355,400                                                    | 0.322                                                               | 223,493.6                                         | 138                                  | 34.59                     | 2951.2                                                              |
| Upper Amu Darya                     | 631          | Asia      | 570.8                                 | 9.0                                   | -4.5                                                    | 22,280,200                                                    | 0.182                                                               | 463,338.9                                         | 27                                   | 36.38                     | 3235.9                                                              |
| Chin Hills - Arakan Coast           | 719          | Asia      | 10,770.8                              | 23.8                                  | 33.6                                                    | 9,955,340                                                     | 0.778                                                               | 107,574.7                                         | 335                                  | 22.33                     | 3388.4                                                              |
| Taimyr                              | 607          | Asia      | 818.7                                 | -13.9                                 | -94.7                                                   | 251,610                                                       | 0.186                                                               | 824,805.7                                         | 42                                   | 72.05                     | 3981.1                                                              |
| Ganges Himalayan Foothills          | 710          | Asia      | 15,376.6                              | 12.7                                  | 15.9                                                    | 29,418,900                                                    | 0.598                                                               | 172,706.9                                         | 160                                  | 29.02                     | 3981.1                                                              |
| Namuda - Tapi                       | 708          | Asia      | 16,444.8                              | 26.4                                  | 27.3                                                    | 108,715,000                                                   | 0.167                                                               | 280,782.5                                         | 137                                  | 22.26                     | 4265.8                                                              |
| Song Hong                           | 761          | Asia      | 20,362.5                              | 21.0                                  | 13.4                                                    | 50,964,100                                                    | 0.894                                                               | 197,695.9                                         | 82                                   | 22.22                     | 4265.8                                                              |
| Aral Sea Drainages                  | 629          | Asia      | 2,162.3                               | 10.5                                  | -30.7                                                   | 4,186,370                                                     | 0.077                                                               | 426,741.0                                         | 21                                   | 44.17                     | 3235.9                                                              |
| Lower & Middle Syr Darya            | 626          | Asia      | 22,271.8                              | 9.0                                   | -22.2                                                   | 10,150,100                                                    | 0.101                                                               | 517,564.5                                         | 44                                   | 45.09                     | 4365.2                                                              |
| Upper Lancang (Mekong)              | 724          | Asia      | 11,162.4                              | 5.0                                   | 20.4                                                    | 4,827,820                                                     | 0.403                                                               | 123,519.8                                         | 121                                  | 28.86                     | 4466.8                                                              |
| Huang He Great Bend                 | 635          | Asia      | 11,653.4                              | 6.8                                   | -1.3                                                    | 15,856,300                                                    | 0.135                                                               | 171,553.3                                         | 16                                   | 39.51                     | 4365.2                                                              |
| Upper Salween                       | 721          | Asia      | 12,999.6                              | 3.3                                   | 21.0                                                    | 4,499,310                                                     | 0.330                                                               | 142,471.0                                         | 49                                   | 29.45                     | 5011.9                                                              |
| Southern Deccan Plateau             | 714          | Asia      | 24,475.2                              | 26.8                                  | 48.8                                                    | 121,967,000                                                   | 0.177                                                               | 323,970.3                                         | 156                                  | 16.06                     | 5623.4                                                              |
| Songhua Jiang                       | 620          | Asia      | 15,390.1                              | 1.9                                   | -16.5                                                   | 53,121,900                                                    | 0.390                                                               | 564,216.1                                         | 89                                   | 46.50                     | 6309.6                                                              |
| Lower Huang He                      | 636          | Asia      | 20,193.4                              | 9.4                                   | 3.9                                                     | 313,057,000                                                   | 0.336                                                               | 807,350.8                                         | 136                                  | 37.51                     | 7413.1                                                              |
| Middle Amu Darya                    | 630          | Asia      | 14,235.0                              | 15.3                                  | -15.4                                                   | 15,068,000                                                    | 0.215                                                               | 444,482.1                                         | 38                                   | 39.29                     | 7413.1                                                              |
| Upper Brahmaputra                   | 711          | Asia      | 24,897.0                              | -0.9                                  | 29.1                                                    | 2,215,980                                                     | 0.302                                                               | 289,353.8                                         | 17                                   | 29.42                     | 9549.9                                                              |
| Middle Brahmaputra                  | 712          | Asia      | 44,907.4                              | 13.1                                  | 4.7                                                     | 14,762,800                                                    | 0.845                                                               | 188,228.2                                         | 260                                  | 27.63                     | 9772.4                                                              |
| Northern Deccan Plateau             | 713          | Asia      | 59,113.1                              | 26.3                                  | 38.4                                                    | 172,620,000                                                   | 0.318                                                               | 557,383.6                                         | 171                                  | 20.08                     | 12589.3                                                             |
| Upper Yangtze                       | 764          | Asia      | 36,057.3                              | 0.5                                   | 21.4                                                    | 8,550,760                                                     | 0.309                                                               | 497,856.9                                         | 259                                  | 32.03                     | 13803.8                                                             |
| Lower & Middle Salween              | 722          | Asia      | 55,181.0                              | 24.0                                  | 45.9                                                    | 11,304,900                                                    | 0.754                                                               | 196,549.4                                         | 171                                  | 17.70                     | 12882.5                                                             |
| Lower Lancang (Mekong)              | 726          | Asia      | 35,896.1                              | 22.4                                  | 33.1                                                    | 9,237,140                                                     | 0.779                                                               | 198,140.7                                         | 188                                  | 20.22                     | 12589.3                                                             |
| Kolyma                              | 609          | Asia      | 4,617.3                               | -14.2                                 | -76.8                                                   | 77,635                                                        | 0.273                                                               | 1,236,796.2                                       | 38                                   | 66.18                     | 16218.1                                                             |
| Middle Amur                         | 617          | Asia      | 14,332.5                              | -4.1                                  | -25.7                                                   | 1,724,780                                                     | 0.414                                                               | 489,315.6                                         | 60                                   | 52.28                     | 14791.1                                                             |
| Lower & Middle Indus                | 703          | Asia      | 115,615.0                             | 24.7                                  | 4.0                                                     | 309,723,000                                                   | 0.148                                                               | 904,830.7                                         | 160                                  | 28.20                     | 15488.2                                                             |
| Kratie - Stung Treng (Mekong)       | 728          | Asia      | 145,127.0                             | 25.5                                  | 61.6                                                    | 4,155,260                                                     | 0.787                                                               | 104,232.2                                         | 270                                  | 13.75                     | 15488.2                                                             |
| Xi Yang                             | 763          | Asia      | 87,632.7                              | 19.4                                  | -2.6                                                    | 194,011,000                                                   | 0.961                                                               | 523,073.5                                         | 414                                  | 23.95                     | 26302.7                                                             |
| Khorat Plateau (Mekong)             | 727          | Asia      | 164,611.0                             | 26.3                                  | 51.0                                                    | 33,068,100                                                    | 0.666                                                               | 222,272.9                                         | 309                                  | 16.24                     | 22387.2                                                             |
| Mekong Delta                        | 729          | Asia      | 313,171.0                             | 26.9                                  | 71.7                                                    | 58,123,000                                                    | 0.704                                                               | 184,651.3                                         | 251                                  | 11.94                     | 27542.3                                                             |
| Lower Amur                          | 616          | Asia      | 28,507.6                              | -0.1                                  | -22.0                                                   | 4,732,590                                                     | 0.478                                                               | 459,730.9                                         | 84                                   | 48.51                     | 41686.9                                                             |
| Middle Yangtze                      | 765          | Asia      | 303,075.0                             | 14.3                                  | -10.8                                                   | 208,006,000                                                   | 0.949                                                               | 519,650.4                                         | 230                                  | 29.07                     | 69183.1                                                             |
| Sitang - Irawaddy                   | 720          | Asia      | 372,866.0                             | 22.9                                  | 26.2                                                    | 58,098,200                                                    | 0.714                                                               | 461,750.9                                         | 241                                  | 22.48                     | 74131.0                                                             |

| ECOREGION                                | Ecoregion ID | Continent | Summed Catch<br>(T yr <sup>-1</sup> ) | Mean Temp <sup>+</sup><br>(Degrees C) | Mean Radiation <sup>+</sup><br>(Watts m <sup>-2</sup> ) | Summed Population <sup>‡</sup><br>(Persons km <sup>-2</sup> ) | Mean NPP <sup>§</sup><br>(Kg-C m <sup>-2</sup> year <sup>-1</sup> ) | Ecoregion Area <sup>¶</sup><br>(km <sup>2</sup> ) | Total Species Richness <sup>¶</sup> | Mean Latitude<br>(Degree) | Summed Mean Annual Discharge<br>(km <sup>3</sup> yr <sup>-1</sup> ) |
|------------------------------------------|--------------|-----------|---------------------------------------|---------------------------------------|---------------------------------------------------------|---------------------------------------------------------------|---------------------------------------------------------------------|---------------------------------------------------|-------------------------------------|---------------------------|---------------------------------------------------------------------|
| Ob                                       | 602          | Asia      | 42,007.0                              | -1.8                                  | -58.2                                                   | 22,863,200                                                    | 0.327                                                               | 3,414,271.4                                       | 47                                  | 57.69                     | 87096.4                                                             |
| Ganges Delta & Plain                     | 709          | Asia      | #####                                 | 25.2                                  | 19.3                                                    | 866,757,000                                                   | 0.415                                                               | 1,047,153.8                                       | 234                                 | 25.30                     | 107151.9                                                            |
| Lena                                     | 608          | Asia      | 52,652.0                              | -11.6                                 | -62.3                                                   | 570,987                                                       | 0.297                                                               | 3,255,686.7                                       | 48                                  | 62.45                     | 125892.5                                                            |
| Yenisei                                  | 605          | Asia      | 59,473.6                              | -6.5                                  | -58.3                                                   | 4,080,000                                                     | 0.337                                                               | 2,055,326.3                                       | 54                                  | 59.67                     | 128825.0                                                            |
| Lower Yangtze                            | 766          | Asia      | 749,538.0                             | 15.6                                  | -2.4                                                    | 485,161,000                                                   | 0.764                                                               | 1,067,473.4                                       | 278                                 | 30.40                     | 141253.8                                                            |
| Pilbara                                  | 802          | Australia | 1.1                                   | 23.6                                  | 23.0                                                    | 124,392                                                       | 0.120                                                               | 529,404.5                                         | 20                                  | -24.09                    | 56.2                                                                |
| Bass Strait Drainages                    | 809          | Australia | 3.1                                   | 13.2                                  | -5.1                                                    | 4,919,460                                                     | 0.818                                                               | 104,792.2                                         | 25                                  | -38.76                    | 120.2                                                               |
| Southwestern Australia                   | 801          | Australia | 3.8                                   | 16.5                                  | 6.9                                                     | 1,850,710                                                     | 0.649                                                               | 117,557.9                                         | 14                                  | -33.30                    | 131.8                                                               |
| Paleo                                    | 804          | Australia | 14.6                                  | 21.2                                  | 18.9                                                    | 274,081                                                       | 0.210                                                               | 2,310,130.1                                       | 5                                   | -26.47                    | 489.8                                                               |
| Kimberley                                | 803          | Australia | 26.5                                  | 27.0                                  | 49.4                                                    | 21,361                                                        | 0.296                                                               | 191,920.1                                         | 47                                  | -17.01                    | 631.0                                                               |
| Eastern Coastal Australia                | 807          | Australia | 62.0                                  | 19.2                                  | 18.1                                                    | 10,727,200                                                    | 0.570                                                               | 565,207.2                                         | 68                                  | -26.38                    | 1445.4                                                              |
| Murray - Darling                         | 808          | Australia | 116.5                                 | 17.6                                  | 10.2                                                    | 3,763,570                                                     | 0.265                                                               | 1,101,111.9                                       | 33                                  | -31.73                    | 2238.7                                                              |
| Arafura - Carpentaria                    | 805          | Australia | 207.5                                 | 26.2                                  | 49.7                                                    | 729,517                                                       | 0.317                                                               | 1,076,864.3                                       | 99                                  | -16.31                    | 4677.4                                                              |
| Volga Delta - Northern Caspian Drainages | 453          | Europe    | 0.0                                   | 10.7                                  | -15.1                                                   | 147,689                                                       | 0.024                                                               | 93,513.2                                          | 63                                  | 45.54                     | 1.5                                                                 |
| Crimea Peninsula                         | 426          | Europe    | 1.4                                   | 10.7                                  | -11.3                                                   | 2,123,290                                                     | 0.421                                                               | 25,937.1                                          | 16                                  | 45.28                     | 6.9                                                                 |
| Southwestern Arabian Coast               | 439          | Europe    | 0.0                                   | 25.4                                  | 23.4                                                    | 41,573,200                                                    | 0.084                                                               | 533,066.4                                         | 15                                  | 18.33                     | 10.2                                                                |
| Caspian Marine                           | 452          | Europe    | 0.1                                   | 14.3                                  | 0.1                                                     | 574,523                                                       | 0.254                                                               | 301,707.2                                         | 58                                  | 40.37                     | 6.3                                                                 |
| Coastal Levant                           | 436          | Europe    | 297.9                                 | 18.3                                  | 0.6                                                     | 16,207,000                                                    | 0.330                                                               | 26,853.2                                          | 26                                  | 32.95                     | 16.2                                                                |
| Aegean Drainages                         | 424          | Europe    | 83.3                                  | 14.3                                  | 7.0                                                     | 5,726,280                                                     | 0.495                                                               | 27,168.0                                          | 23                                  | 38.28                     | 17.8                                                                |
| Arabian Interior                         | 440          | Europe    | 14.0                                  | 24.4                                  | -18.5                                                   | 41,081,600                                                    | 0.029                                                               | 2,326,742.2                                       | 15                                  | 24.35                     | 22.4                                                                |
| Jordan River                             | 438          | Europe    | 1,430.4                               | 18.4                                  | -11.0                                                   | 10,814,800                                                    | 0.194                                                               | 41,116.1                                          | 25                                  | 31.51                     | 25.7                                                                |
| Turan Plain                              | 450          | Europe    | 20.3                                  | 14.4                                  | -21.1                                                   | 4,258,560                                                     | 0.120                                                               | 296,896.3                                         | 19                                  | 40.52                     | 40.7                                                                |
| Ionian Drainages                         | 421          | Europe    | 343.1                                 | 14.6                                  | 5.3                                                     | 1,276,290                                                     | 0.595                                                               | 34,119.5                                          | 34                                  | 38.25                     | 57.5                                                                |
| Orumiyeh                                 | 445          | Europe    | 0.3                                   | 10.2                                  | -2.9                                                    | 6,219,800                                                     | 0.404                                                               | 51,773.6                                          | 10                                  | 37.35                     | 67.6                                                                |
| Central Anatolia                         | 431          | Europe    | 446.4                                 | 10.5                                  | -4.0                                                    | 4,402,480                                                     | 0.445                                                               | 71,156.0                                          | 26                                  | 38.02                     | 72.4                                                                |
| Orontes                                  | 437          | Europe    | 290.2                                 | 16.0                                  | -6.0                                                    | 5,050,040                                                     | 0.550                                                               | 25,448.3                                          | 32                                  | 35.44                     | 64.6                                                                |
| Vardar                                   | 422          | Europe    | 674.8                                 | 10.9                                  | -9.5                                                    | 3,035,090                                                     | 0.494                                                               | 49,431.0                                          | 25                                  | 40.78                     | 147.9                                                               |
| Dalmatia                                 | 419          | Europe    | 229.6                                 | 11.0                                  | -14.2                                                   | 2,638,300                                                     | 0.656                                                               | 39,275.7                                          | 40                                  | 43.92                     | 182.0                                                               |
| Southeast Adriatic Drainages             | 420          | Europe    | 1,599.4                               | 11.3                                  | -9.0                                                    | 4,811,730                                                     | 0.571                                                               | 43,963.0                                          | 46                                  | 41.37                     | 213.8                                                               |
| Western Anatolia                         | 429          | Europe    | 1,675.8                               | 14.4                                  | 5.5                                                     | 9,225,430                                                     | 0.427                                                               | 79,953.3                                          | 49                                  | 38.18                     | 223.9                                                               |
| Southern Anatolia                        | 432          | Europe    | 2,177.1                               | 12.5                                  | 2.9                                                     | 10,868,100                                                    | 0.401                                                               | 100,556.2                                         | 71                                  | 37.07                     | 288.4                                                               |
| Western Transcaucasia                    | 433          | Europe    | 757.0                                 | 8.7                                   | -12.1                                                   | 6,193,330                                                     | 0.560                                                               | 84,391.4                                          | 57                                  | 41.73                     | 295.1                                                               |
| Southern Iberia                          | 413          | Europe    | 424.9                                 | 15.3                                  | 0.7                                                     | 10,582,700                                                    | 0.450                                                               | 169,618.3                                         | 30                                  | 38.05                     | 338.8                                                               |
| Thrace                                   | 423          | Europe    | 2,230.4                               | 11.7                                  | -7.2                                                    | 21,431,300                                                    | 0.501                                                               | 132,838.3                                         | 80                                  | 41.13                     | 398.1                                                               |
| Northern Anatolia                        | 430          | Europe    | 3,810.4                               | 10.1                                  | -5.1                                                    | 15,622,900                                                    | 0.483                                                               | 208,845.0                                         | 68                                  | 40.14                     | 501.2                                                               |
| Kuban                                    | 428          | Europe    | 71.0                                  | 9.6                                   | -17.1                                                   | 3,018,650                                                     | 0.623                                                               | 55,248.4                                          | 67                                  | 44.48                     | 416.9                                                               |
| Norwegian Sea Drainages                  | 405          | Europe    | 267.9                                 | 2.0                                   | -81.4                                                   | 1,085,740                                                     | 0.437                                                               | 163,068.9                                         | 15                                  | 63.21                     | 871.0                                                               |
| Western Caspian Drainages                | 411          | Europe    | 162.4                                 | 9.0                                   | -21.4                                                   | 9,018,010                                                     | 0.408                                                               | 206,984.1                                         | 53                                  | 44.18                     | 812.8                                                               |
| Kura - South Caspian Drainages           | 434          | Europe    | 10,799.3                              | 9.7                                   | -8.5                                                    | 21,828,200                                                    | 0.481                                                               | 232,187.9                                         | 58                                  | 39.84                     | 831.8                                                               |
| Eastern Iberia                           | 414          | Europe    | 3,190.9                               | 12.0                                  | -5.0                                                    | 13,087,900                                                    | 0.438                                                               | 149,051.0                                         | 29                                  | 41.08                     | 1122.0                                                              |
| Western Iberia                           | 412          | Europe    | 1,202.2                               | 12.9                                  | -5.5                                                    | 18,359,700                                                    | 0.534                                                               | 228,928.6                                         | 28                                  | 40.75                     | 1548.8                                                              |
| Cantabric Coast - Languedoc              | 403          | Europe    | 1,081.8                               | 11.2                                  | -16.6                                                   | 18,823,400                                                    | 0.651                                                               | 220,538.7                                         | 31                                  | 43.98                     | 2187.8                                                              |
| Southern Baltic Lowlands                 | 408          | Europe    | 4,496.1                               | 5.0                                   | -55.9                                                   | 6,858,730                                                     | 0.575                                                               | 316,977.6                                         | 48                                  | 57.32                     | 2398.8                                                              |
| Don                                      | 427          | Europe    | 616.4                                 | 7.7                                   | -33.1                                                   | 22,076,200                                                    | 0.358                                                               | 507,337.7                                         | 70                                  | 49.31                     | 2754.2                                                              |
| Gulf of Venice Drainages                 | 415          | Europe    | 4,350.4                               | 8.9                                   | -21.4                                                   | 24,890,300                                                    | 0.657                                                               | 135,176.6                                         | 41                                  | 45.22                     | 2884.0                                                              |
| Northern Baltic Drainages                | 406          | Europe    | 36,437.8                              | 1.5                                   | -73.0                                                   | 11,880,600                                                    | 0.439                                                               | 879,518.1                                         | 49                                  | 62.50                     | 4786.3                                                              |
| Upper Tigris & Euphrates                 | 442          | Europe    | 28,686.2                              | 15.6                                  | -7.7                                                    | 39,404,300                                                    | 0.259                                                               | 504,796.0                                         | 70                                  | 34.36                     | 3715.4                                                              |
| Dnieper - South Bug                      | 425          | Europe    | 6,209.5                               | 7.2                                   | -38.1                                                   | 29,789,300                                                    | 0.542                                                               | 597,795.1                                         | 77                                  | 50.71                     | 5495.4                                                              |
| Lower Tigris & Euphrates                 | 441          | Europe    | 23,579.3                              | 21.7                                  | -24.0                                                   | 36,463,800                                                    | 0.085                                                               | 340,388.9                                         | 42                                  | 33.68                     | 7762.5                                                              |

| ECOREGION                                     | Ecoregion ID | Continent                 | Summed Catch (T yr <sup>-1</sup> ) | Mean Temp* (Degrees C) | Mean Radiation <sup>†</sup> (Watts m <sup>-2</sup> ) | Summed Population <sup>‡</sup> (Persons km <sup>-2</sup> ) | Mean NPP <sup>§</sup> (Kg-C m <sup>-2</sup> year <sup>-1</sup> ) | Ecoregion Area <sup>¶</sup> (km <sup>2</sup> ) | Total Species Richness <sup>  </sup> | Mean Latitude (Degree) | Summed Mean Annual Discharge (km <sup>3</sup> yr <sup>-1</sup> ) |
|-----------------------------------------------|--------------|---------------------------|------------------------------------|------------------------|------------------------------------------------------|------------------------------------------------------------|------------------------------------------------------------------|------------------------------------------------|--------------------------------------|------------------------|------------------------------------------------------------------|
| Upper Danube                                  | 417          | Europe                    | 11,418.3                           | 7.9                    | -34.0                                                | 27,773,700                                                 | 0.642                                                            | 248,438.5                                      | 59                                   | 47.83                  | 7943.3                                                           |
| Central & Western Europe                      | 404          | Europe                    | 50,654.1                           | 8.5                    | -44.2                                                | 216,227,000                                                | 0.674                                                            | 1,420,196.0                                    | 96                                   | 50.83                  | 16218.1                                                          |
| Barents Sea Drainages                         | 407          | Europe                    | 7,402.2                            | -2.9                   | -82.6                                                | 1,798,460                                                  | 0.355                                                            | 1,482,129.4                                    | 48                                   | 65.69                  | 21877.6                                                          |
| Dniester - Lower Danube                       | 418          | Europe                    | 20,054.7                           | 9.2                    | -25.5                                                | 57,082,300                                                 | 0.597                                                            | 653,453.3                                      | 111                                  | 45.77                  | 30199.5                                                          |
| Volga - Ural                                  | 410          | Europe                    | 27,961.4                           | 4.4                    | -44.9                                                | 49,977,700                                                 | 0.371                                                            | 2,034,275.5                                    | 68                                   | 53.48                  | 64565.4                                                          |
| Rio Salado                                    | 137          | North and Central America | 17.6                               | 20.2                   | 19.2                                                 | 681,412                                                    | 0.214                                                            | 62,008.3                                       | 38                                   | 27.37                  | 5.1                                                              |
| Rio San Juan (Mexico)                         | 138          | North and Central America | 18.0                               | 20.6                   | 23.3                                                 | 5,551,300                                                  | 0.177                                                            | 36,946.1                                       | 44                                   | 25.78                  | 5.1                                                              |
| Llanos El Salado                              | 166          | North and Central America | 19.8                               | 17.5                   | 34.8                                                 | 2,826,890                                                  | 0.250                                                            | 67,401.1                                       | 6                                    | 23.02                  | 5.9                                                              |
| Guzman - Samalayuca                           | 161          | North and Central America | 22.4                               | 15.6                   | 20.2                                                 | 2,428,850                                                  | 0.080                                                            | 125,822.6                                      | 35                                   | 30.43                  | 6.6                                                              |
| Vegas - Virgin                                | 129          | North and Central America | 0.0                                | 12.5                   | 2.7                                                  | 1,711,850                                                  | 0.047                                                            | 34,538.4                                       | 10                                   | 37.30                  | 7.1                                                              |
| Pecos                                         | 133          | North and Central America | 0.1                                | 14.8                   | 11.6                                                 | 318,622                                                    | 0.159                                                            | 114,838.1                                      | 54                                   | 32.55                  | 12.0                                                             |
| Rio Conchos                                   | 134          | North and Central America | 148.7                              | 16.4                   | 29.0                                                 | 1,088,230                                                  | 0.129                                                            | 74,256.1                                       | 38                                   | 27.82                  | 29.5                                                             |
| Mayran - Viesca                               | 163          | North and Central America | 174.6                              | 18.2                   | 29.0                                                 | 3,629,830                                                  | 0.181                                                            | 199,144.0                                      | 16                                   | 25.60                  | 38.0                                                             |
| West Texas Gulf                               | 139          | North and Central America | 0.4                                | 21.5                   | 11.9                                                 | 936,436                                                    | 0.228                                                            | 73,008.1                                       | 56                                   | 28.36                  | 38.0                                                             |
| Gila                                          | 131          | North and Central America | 0.7                                | 16.6                   | 11.4                                                 | 6,262,790                                                  | 0.024                                                            | 159,943.5                                      | 27                                   | 33.11                  | 61.7                                                             |
| Southern California Coastal - Baja California | 159          | North and Central America | 21.2                               | 18.4                   | 23.7                                                 | 28,803,000                                                 | 0.081                                                            | 172,969.0                                      | 18                                   | 29.25                  | 72.4                                                             |
| Lerma - Chapala                               | 165          | North and Central America | 526.8                              | 17.0                   | 46.2                                                 | 44,405,800                                                 | 0.661                                                            | 77,443.8                                       | 37                                   | 20.10                  | 91.2                                                             |
| Chagres                                       | 209          | North and Central America | 105.4                              | 25.1                   | 60.2                                                 | 1,237,780                                                  | 0.911                                                            | 11,939.4                                       | 54                                   | 9.06                   | 81.3                                                             |
| Yucatan                                       | 175          | North and Central America | 541.9                              | 26.1                   | 35.9                                                 | 3,849,310                                                  | 0.567                                                            | 66,922.8                                       | 54                                   | 20.53                  | 95.5                                                             |
| Santa Maria                                   | 208          | North and Central America | 114.6                              | 25.6                   | 57.1                                                 | 675,490                                                    | 0.813                                                            | 16,362.4                                       | 57                                   | 7.98                   | 81.3                                                             |
| Death Valley                                  | 128          | North and Central America | 1.1                                | 15.7                   | 1.5                                                  | 975,343                                                    | 0.101                                                            | 80,702.9                                       | 9                                    | 35.95                  | 87.1                                                             |
| Ameca - Manantlan                             | 168          | North and Central America | 679.3                              | 22.7                   | 54.3                                                 | 2,821,210                                                  | 0.438                                                            | 47,961.2                                       | 32                                   | 19.91                  | 109.6                                                            |
| Bonneville                                    | 127          | North and Central America | 1.4                                | 7.6                    | -6.0                                                 | 2,566,720                                                  | 0.076                                                            | 155,708.6                                      | 20                                   | 40.00                  | 131.8                                                            |
| Lahontan                                      | 126          | North and Central America | 1.5                                | 8.7                    | -0.2                                                 | 854,683                                                    | 0.051                                                            | 207,453.8                                      | 14                                   | 39.59                  | 138.0                                                            |
| Sonora                                        | 160          | North and Central America | 930.7                              | 21.7                   | 21.6                                                 | 2,691,600                                                  | 0.034                                                            | 183,838.5                                      | 21                                   | 29.71                  | 138.0                                                            |
| Coatzacoalcos                                 | 172          | North and Central America | 1,050.0                            | 24.7                   | 38.4                                                 | 854,801                                                    | 0.554                                                            | 19,555.0                                       | 57                                   | 17.30                  | 125.9                                                            |
| Estero Real - Tempisque                       | 204          | North and Central America | 203.6                              | 26.2                   | 67.5                                                 | 5,597,860                                                  | 0.621                                                            | 30,035.9                                       | 40                                   | 11.33                  | 166.0                                                            |
| Chiriqui                                      | 206          | North and Central America | 260.2                              | 23.3                   | 57.1                                                 | 1,453,370                                                  | 0.959                                                            | 25,615.0                                       | 62                                   | 8.72                   | 173.8                                                            |

| ECOREGION                            | Ecoregion ID | Continent                 | Summed Catch (T yr <sup>-1</sup> ) | Mean Temp* (Degrees C) | Mean Radiation <sup>†</sup> (Watts m <sup>-2</sup> ) | Summed Population <sup>‡</sup> (Persons km <sup>-2</sup> ) | Mean NPP <sup>§</sup> (Kg-C m <sup>-2</sup> year <sup>-1</sup> ) | Ecoregion Area <sup>¶</sup> (km <sup>2</sup> ) | Total Species Richness <sup>  </sup> | Mean Latitude (Degree) | Summed Mean Annual Discharge (km <sup>3</sup> yr <sup>-1</sup> ) |
|--------------------------------------|--------------|---------------------------|------------------------------------|------------------------|------------------------------------------------------|------------------------------------------------------------|------------------------------------------------------------------|------------------------------------------------|--------------------------------------|------------------------|------------------------------------------------------------------|
| West Florida Gulf                    | 154          | North and Central America | 2.6                                | 18.4                   | 17.8                                                 | 1,247,210                                                  | 0.617                                                            | 34,434.0                                       | 110                                  | 31.13                  | 177.8                                                            |
| Sierra Madre del Sur                 | 170          | North and Central America | 1,575.4                            | 23.5                   | 60.1                                                 | 5,203,120                                                  | 0.501                                                            | 63,869.4                                       | 7                                    | 16.85                  | 213.8                                                            |
| Upper Rio Grande - Bravo             | 132          | North and Central America | 92.6                               | 10.6                   | 11.5                                                 | 3,253,230                                                  | 0.049                                                            | 163,269.6                                      | 28                                   | 34.13                  | 229.1                                                            |
| Isthmus Caribbean                    | 207          | North and Central America | 383.5                              | 21.7                   | 51.2                                                 | 241,506                                                    | 1.137                                                            | 10,836.7                                       | 75                                   | 9.10                   | 186.2                                                            |
| Sinaloa                              | 162          | North and Central America | 2,176.9                            | 21.2                   | 41.6                                                 | 4,179,020                                                  | 0.239                                                            | 125,344.7                                      | 16                                   | 25.31                  | 302.0                                                            |
| Rio Santiago                         | 164          | North and Central America | 2,941.2                            | 18.9                   | 48.0                                                 | 9,575,060                                                  | 0.468                                                            | 93,985.1                                       | 24                                   | 21.96                  | 323.6                                                            |
| Rio Tuira                            | 210          | North and Central America | 634.4                              | 26.0                   | 63.1                                                 | 1,267,400                                                  | 0.919                                                            | 24,359.2                                       | 72                                   | 8.48                   | 316.2                                                            |
| US Southern Plains                   | 144          | North and Central America | 6.5                                | 12.8                   | 5.3                                                  | 5,408,690                                                  | 0.352                                                            | 417,663.9                                      | 110                                  | 36.37                  | 524.8                                                            |
| Lower Rio Grande - Bravo             | 135          | North and Central America | 650.5                              | 20.7                   | 18.4                                                 | 4,553,940                                                  | 0.160                                                            | 151,813.0                                      | 90                                   | 27.91                  | 426.6                                                            |
| Florida Peninsula                    | 156          | North and Central America | 7.0                                | 21.3                   | 24.7                                                 | 20,491,400                                                 | 0.725                                                            | 156,221.9                                      | 87                                   | 28.83                  | 501.2                                                            |
| East Texas Gulf                      | 140          | North and Central America | 7.3                                | 18.0                   | 9.5                                                  | 7,782,560                                                  | 0.320                                                            | 268,192.5                                      | 98                                   | 31.60                  | 512.9                                                            |
| Upper Snake                          | 122          | North and Central America | 7.8                                | 5.4                    | -11.6                                                | 546,660                                                    | 0.099                                                            | 92,657.1                                       | 23                                   | 43.22                  | 467.7                                                            |
| Panuco                               | 167          | North and Central America | 5,779.8                            | 20.9                   | 32.2                                                 | 11,945,900                                                 | 0.402                                                            | 135,200.0                                      | 58                                   | 21.79                  | 602.6                                                            |
| Sabine - Galveston                   | 141          | North and Central America | 10.5                               | 19.0                   | 10.5                                                 | 15,341,400                                                 | 0.466                                                            | 137,327.9                                      | 111                                  | 31.39                  | 660.7                                                            |
| Papaloapan                           | 171          | North and Central America | 6,311.0                            | 20.8                   | 38.6                                                 | 7,025,840                                                  | 0.644                                                            | 56,300.8                                       | 55                                   | 18.21                  | 645.7                                                            |
| Oregon & Northern California Coastal | 123          | North and Central America | 12.3                               | 9.5                    | -0.6                                                 | 2,415,180                                                  | 0.489                                                            | 106,496.6                                      | 45                                   | 41.98                  | 758.6                                                            |
| Chiapas - Fonseca                    | 201          | North and Central America | 3,958.1                            | 23.9                   | 60.7                                                 | 22,673,900                                                 | 0.681                                                            | 90,923.3                                       | 40                                   | 14.68                  | 977.2                                                            |
| Apalachicola                         | 155          | North and Central America | 17.8                               | 17.9                   | 15.7                                                 | 4,521,670                                                  | 0.639                                                            | 53,828.0                                       | 113                                  | 32.07                  | 851.1                                                            |
| Rio Balsas                           | 169          | North and Central America | 11,545.6                           | 22.0                   | 54.6                                                 | 13,330,600                                                 | 0.578                                                            | 116,232.0                                      | 14                                   | 18.53                  | 955.0                                                            |
| Upper Saskatchewan                   | 107          | North and Central America | 63.1                               | 2.4                    | -37.7                                                | 2,697,100                                                  | 0.357                                                            | 223,119.4                                      | 38                                   | 51.76                  | 1148.2                                                           |
| Quintana Roo - Motagua               | 202          | North and Central America | 2,334.3                            | 24.4                   | 38.6                                                 | 7,530,180                                                  | 0.899                                                            | 96,030.1                                       | 88                                   | 17.30                  | 1071.5                                                           |
| Middle Saskatchewan                  | 108          | North and Central America | 88.9                               | 1.3                    | -41.9                                                | 681,548                                                    | 0.343                                                            | 316,209.2                                      | 36                                   | 52.90                  | 1412.5                                                           |
| Chesapeake Bay                       | 158          | North and Central America | 34.5                               | 10.6                   | -8.9                                                 | 14,964,300                                                 | 0.670                                                            | 142,924.6                                      | 103                                  | 39.97                  | 1548.8                                                           |
| Appalachian Piedmont                 | 157          | North and Central America | 34.9                               | 15.7                   | 11.9                                                 | 22,177,100                                                 | 0.676                                                            | 310,693.5                                      | 184                                  | 34.81                  | 2089.3                                                           |
| Ouachita Highlands                   | 145          | North and Central America | 35.6                               | 17.1                   | 8.3                                                  | 2,673,160                                                  | 0.607                                                            | 115,437.7                                      | 161                                  | 33.56                  | 1584.9                                                           |

| ECOREGION                                          | Ecoregion ID | Continent                 | Summed Catch (T yr <sup>-1</sup> ) | Mean Temp* (Degrees C) | Mean Radiation <sup>†</sup> (Watts m <sup>-2</sup> ) | Summed Population <sup>‡</sup> (Persons km <sup>-2</sup> ) | Mean NPP <sup>§</sup> (Kg-C m <sup>-2</sup> year <sup>-1</sup> ) | Ecoregion Area <sup>¶</sup> (km <sup>2</sup> ) | Total Species Richness <sup>  </sup> | Mean Latitude (Degree) | Summed Mean Annual Discharge (km <sup>3</sup> yr <sup>-1</sup> ) |
|----------------------------------------------------|--------------|---------------------------|------------------------------------|------------------------|------------------------------------------------------|------------------------------------------------------------|------------------------------------------------------------------|------------------------------------------------|--------------------------------------|------------------------|------------------------------------------------------------------|
| Sacramento - San Joaquin                           | 125          | North and Central America | 35.8                               | 12.8                   | 4.6                                                  | 15,010,300                                                 | 0.250                                                            | 183,455.8                                      | 35                                   | 38.07                  | 1698.2                                                           |
| Upper Usumacinta                                   | 174          | North and Central America | 12,157.5                           | 22.6                   | 42.8                                                 | 4,119,120                                                  | 0.925                                                            | 65,826.4                                       | 61                                   | 16.48                  | 1548.8                                                           |
| Mosquitia                                          | 203          | North and Central America | 171.4                              | 24.1                   | 40.8                                                 | 7,793,210                                                  | 0.941                                                            | 123,240.3                                      | 54                                   | 14.76                  | 1778.3                                                           |
| Cumberland                                         | 151          | North and Central America | 38.2                               | 13.8                   | -1.7                                                 | 2,490,440                                                  | 0.725                                                            | 46,408.9                                       | 178                                  | 36.47                  | 1445.4                                                           |
| Ozark Highlands                                    | 147          | North and Central America | 46.2                               | 14.5                   | 2.9                                                  | 1,613,290                                                  | 0.688                                                            | 85,569.7                                       | 174                                  | 36.17                  | 1819.7                                                           |
| Gulf of St.Lawrence Coastal Drainages              | 114          | North and Central America | 160.9                              | -1.7                   | -37.3                                                | 70,652                                                     | 0.380                                                            | 265,911.7                                      | 31                                   | 51.18                  | 2754.2                                                           |
| San Juan (Nicaragua/Costa Rica)                    | 205          | North and Central America | 1,048.8                            | 25.2                   | 47.3                                                 | 7,259,950                                                  | 0.950                                                            | 104,659.5                                      | 81                                   | 11.99                  | 2454.7                                                           |
| Central Arctic Coastal                             | 106          | North and Central America | 183.9                              | -11.4                  | -88.6                                                | 1,102                                                      | 0.239                                                            | 586,888.6                                      | 22                                   | 66.45                  | 2187.8                                                           |
| Mobile Bay                                         | 153          | North and Central America | 64.5                               | 16.8                   | 12.1                                                 | 5,391,790                                                  | 0.668                                                            | 114,608.0                                      | 194                                  | 33.13                  | 2570.4                                                           |
| Western Hudson Bay                                 | 111          | North and Central America | 220.5                              | -11.2                  | -82.4                                                | 8,235                                                      | 0.251                                                            | 883,481.7                                      | 32                                   | 63.05                  | 3548.1                                                           |
| Colorado                                           | 130          | North and Central America | 3,866.1                            | 9.8                    | 1.5                                                  | 3,437,320                                                  | 0.050                                                            | 507,152.8                                      | 37                                   | 37.24                  | 3388.4                                                           |
| Northeast US & Southeast Canada Atlantic Drainages | 118          | North and Central America | 153.2                              | 5.6                    | -18.0                                                | 41,287,800                                                 | 0.608                                                            | 355,791.4                                      | 104                                  | 44.46                  | 3981.1                                                           |
| Grijalva - Usumacinta                              | 173          | North and Central America | 47,787.6                           | 24.8                   | 45.4                                                 | 9,359,280                                                  | 0.700                                                            | 112,525.9                                      | 99                                   | 17.52                  | 3020.0                                                           |
| Upper Missouri                                     | 142          | North and Central America | 100.4                              | 6.0                    | -21.2                                                | 1,270,410                                                  | 0.205                                                            | 678,362.6                                      | 64                                   | 45.99                  | 4168.7                                                           |
| Middle Missouri                                    | 143          | North and Central America | 102.0                              | 8.7                    | -10.5                                                | 8,681,300                                                  | 0.374                                                            | 593,247.3                                      | 113                                  | 41.43                  | 3890.5                                                           |
| Tennessee                                          | 152          | North and Central America | 128.1                              | 13.7                   | 2.0                                                  | 5,424,990                                                  | 0.733                                                            | 105,845.8                                      | 228                                  | 35.58                  | 4168.7                                                           |
| Central Prairie                                    | 146          | North and Central America | 141.0                              | 13.5                   | -2.4                                                 | 5,960,920                                                  | 0.635                                                            | 158,558.0                                      | 167                                  | 37.59                  | 4365.2                                                           |
| Upper Yukon                                        | 102          | North and Central America | 358.1                              | -6.7                   | -68.4                                                | 75,753                                                     | 0.329                                                            | 579,717.5                                      | 34                                   | 64.05                  | 7079.5                                                           |
| Alaska & Canada Pacific Coastal                    | 103          | North and Central America | 769.2                              | 1.4                    | -52.4                                                | 7,121,530                                                  | 0.419                                                            | 901,726.2                                      | 68                                   | 55.19                  | 11749.0                                                          |
| Columbia Glaciated                                 | 120          | North and Central America | 446.3                              | 4.5                    | -25.1                                                | 2,156,650                                                  | 0.384                                                            | 256,029.4                                      | 64                                   | 48.71                  | 10000.0                                                          |
| Upper Mackenzie                                    | 104          | North and Central America | 1,287.9                            | -0.6                   | -45.0                                                | 332,324                                                    | 0.349                                                            | 628,861.4                                      | 50                                   | 56.83                  | 12882.5                                                          |
| Eastern Hudson Bay - Ungava                        | 113          | North and Central America | 1,309.2                            | -5.3                   | -63.0                                                | 34,182                                                     | 0.311                                                            | 1,077,970.7                                    | 44                                   | 55.59                  | 16595.9                                                          |
| Alaskan Coastal                                    | 101          | North and Central America | 430.7                              | -6.1                   | -80.6                                                | 55,500                                                     | 0.279                                                            | 983,265.2                                      | 40                                   | 64.14                  | 13182.6                                                          |
| Upper Mississippi                                  | 148          | North and Central America | 433.9                              | 8.0                    | -17.9                                                | 23,282,200                                                 | 0.581                                                            | 477,589.3                                      | 180                                  | 42.82                  | 12302.7                                                          |
| Southern Hudson Bay                                | 110          | North and Central America | 1,490.4                            | -2.1                   | -38.2                                                | 227,237                                                    | 0.408                                                            | 995,553.1                                      | 71                                   | 52.92                  | 16982.4                                                          |

| ECOREGION                                    | Ecoregion ID | Continent                 | Summed Catch (T yr <sup>-1</sup> ) | Mean Temp* (Degrees C) | Mean Radiation <sup>†</sup> (Watts m <sup>-2</sup> ) | Summed Population <sup>‡</sup> (Persons km <sup>-2</sup> ) | Mean NPP <sup>§</sup> (Kg-C m <sup>-2</sup> year <sup>-1</sup> ) | Ecoregion Area <sup>¶</sup> (km <sup>2</sup> ) | Total Species Richness <sup>  </sup> | Mean Latitude (Degree) | Summed Mean Annual Discharge (km <sup>3</sup> yr <sup>-1</sup> ) |
|----------------------------------------------|--------------|---------------------------|------------------------------------|------------------------|------------------------------------------------------|------------------------------------------------------------|------------------------------------------------------------------|------------------------------------------------|--------------------------------------|------------------------|------------------------------------------------------------------|
| Teays - Old Ohio                             | 150          | North and Central America | 490.4                              | 11.2                   | -9.8                                                 | 22,558,600                                                 | 0.693                                                            | 373,583.9                                      | 226                                  | 39.12                  | 13803.8                                                          |
| Columbia Unglaciated                         | 121          | North and Central America | 538.7                              | 7.0                    | -9.7                                                 | 4,565,990                                                  | 0.258                                                            | 321,263.5                                      | 45                                   | 44.75                  | 13182.6                                                          |
| St.Lawrence                                  | 117          | North and Central America | 2,814.8                            | 2.3                    | -26.3                                                | 8,732,100                                                  | 0.527                                                            | 389,727.7                                      | 107                                  | 47.15                  | 20893.0                                                          |
| Lower Mackenzie                              | 105          | North and Central America | 5,812.6                            | -6.3                   | -65.7                                                | 29,917                                                     | 0.281                                                            | 1,089,535.7                                    | 46                                   | 62.58                  | 40738.0                                                          |
| Lower Mississippi                            | 149          | North and Central America | 4,327.8                            | 17.6                   | 11.8                                                 | 9,779,890                                                  | 0.642                                                            | 246,389.7                                      | 224                                  | 32.86                  | 72443.6                                                          |
| Atacama                                      | 338          | South America             | 0.1                                | 13.2                   | 28.8                                                 | 1,604,250                                                  | 0.003                                                            | 133,071.9                                      | 3                                    | -21.44                 | 0.8                                                              |
| Fluminense                                   | 352          | South America             | 0.1                                | 21.2                   | 28.4                                                 | 11,379,700                                                 | 1.185                                                            | 11,304.7                                       | 110                                  | -22.63                 | 9.8                                                              |
| Tramandai - Mampituba                        | 335          | South America             | 0.3                                | 16.7                   | 12.9                                                 | 871,065                                                    | 1.148                                                            | 8,446.0                                        | 97                                   | -29.08                 | 22.9                                                             |
| Orinoco High Andes                           | 305          | South America             | 15.0                               | 16.9                   | 51.3                                                 | 5,873,590                                                  | 1.073                                                            | 56,634.7                                       | 54                                   | 6.07                   | 223.9                                                            |
| South America Caribbean Drainages - Trinidad | 304          | South America             | 13.4                               | 25.7                   | 66.7                                                 | 18,189,900                                                 | 0.568                                                            | 133,756.8                                      | 215                                  | 10.55                  | 251.2                                                            |
| Central Andean Pacific Slopes                | 336          | South America             | 135.8                              | 14.4                   | 52.3                                                 | 20,301,100                                                 | 0.210                                                            | 241,895.8                                      | 37                                   | -12.55                 | 316.2                                                            |
| Mar Chiquita - Salinas Grandes               | 339          | South America             | 20.5                               | 14.8                   | 17.6                                                 | 7,457,560                                                  | 0.252                                                            | 567,882.8                                      | 74                                   | -29.93                 | 302.0                                                            |
| Southeastern Mata Atlantica                  | 331          | South America             | 5.7                                | 18.1                   | 7.5                                                  | 4,410,980                                                  | 1.120                                                            | 37,710.5                                       | 97                                   | -26.95                 | 239.9                                                            |
| Ribeira de Iguape                            | 330          | South America             | 6.7                                | 18.9                   | 12.7                                                 | 4,232,290                                                  | 1.127                                                            | 36,616.7                                       | 110                                  | -24.40                 | 269.2                                                            |
| Maracaibo                                    | 303          | South America             | 23.9                               | 24.2                   | 70.7                                                 | 8,472,320                                                  | 0.777                                                            | 72,114.9                                       | 127                                  | 9.16                   | 363.1                                                            |
| Northeastern Caatinga & Coastal Drainages    | 326          | South America             | 9.5                                | 25.7                   | 46.8                                                 | 29,696,400                                                 | 0.379                                                            | 286,599.8                                      | 88                                   | -6.15                  | 501.2                                                            |
| Cuyan - Desaguadero                          | 340          | South America             | 62.9                               | 12.0                   | 19.8                                                 | 3,167,960                                                  | 0.171                                                            | 298,283.3                                      | 13                                   | -33.12                 | 691.8                                                            |
| Bonaerensean Drainages                       | 347          | South America             | 70.4                               | 15.3                   | 6.5                                                  | 3,404,650                                                  | 0.565                                                            | 265,200.4                                      | 42                                   | -36.51                 | 776.2                                                            |
| Ucayali - Urubamba Piedmont                  | 317          | South America             | 722.1                              | 25.0                   | 47.7                                                 | 721,772                                                    | 0.968                                                            | 111,167.4                                      | 224                                  | -9.51                  | 933.3                                                            |
| Amazonas High Andes                          | 312          | South America             | 474.2                              | 14.2                   | 41.6                                                 | 20,650,600                                                 | 0.673                                                            | 556,331.3                                      | 75                                   | -11.00                 | 1584.9                                                           |
| Orinoco Piedmont                             | 306          | South America             | 148.3                              | 23.6                   | 56.8                                                 | 6,438,320                                                  | 0.932                                                            | 73,271.0                                       | 168                                  | 6.05                   | 1258.9                                                           |
| Paraiba do Sul                               | 329          | South America             | 42.5                               | 20.3                   | 24.6                                                 | 10,847,400                                                 | 1.069                                                            | 64,835.5                                       | 96                                   | -22.04                 | 1258.9                                                           |
| Iguassu                                      | 346          | South America             | 78.1                               | 17.8                   | 10.8                                                 | 6,122,750                                                  | 1.044                                                            | 67,537.7                                       | 68                                   | -25.87                 | 1737.8                                                           |
| Northeastern Mata Atlantica                  | 328          | South America             | 66.7                               | 22.9                   | 26.3                                                 | 24,466,500                                                 | 0.756                                                            | 494,883.2                                      | 180                                  | -15.47                 | 2238.7                                                           |
| Parnaiba                                     | 325          | South America             | 78.2                               | 26.5                   | 55.4                                                 | 5,993,080                                                  | 0.440                                                            | 362,472.0                                      | 95                                   | -6.94                  | 2454.7                                                           |
| Upper Uruguay                                | 333          | South America             | 98.4                               | 17.8                   | 11.6                                                 | 2,984,400                                                  | 1.112                                                            | 78,976.2                                       | 153                                  | -27.46                 | 2041.7                                                           |
| Patagonia                                    | 348          | South America             | 577.1                              | 8.8                    | -12.0                                                | 2,344,240                                                  | 0.417                                                            | 1,102,198.1                                    | 19                                   | -44.79                 | 5495.4                                                           |
| Essequibo                                    | 310          | South America             | 593.1                              | 25.4                   | 63.6                                                 | 346,716                                                    | 0.800                                                            | 160,222.6                                      | 301                                  | 5.19                   | 5623.4                                                           |
| North Andean Pacific Slopes - Rio Atrato     | 301          | South America             | 1,051.2                            | 23.2                   | 41.8                                                 | 23,634,400                                                 | 0.670                                                            | 261,578.7                                      | 216                                  | 0.72                   | 7244.4                                                           |
| Guapore - Itenez                             | 319          | South America             | 485.9                              | 25.5                   | 42.8                                                 | 934,971                                                    | 0.704                                                            | 354,313.7                                      | 258                                  | -15.10                 | 6760.8                                                           |
| Guianas                                      | 311          | South America             | 431.2                              | 26.1                   | 65.8                                                 | 1,590,330                                                  | 0.919                                                            | 296,984.1                                      | 413                                  | 4.03                   | 8317.6                                                           |
| Paraguay                                     | 343          | South America             | 1,866.4                            | 24.9                   | 34.2                                                 | 8,686,310                                                  | 0.731                                                            | 546,031.6                                      | 332                                  | -19.14                 | 8511.4                                                           |
| Chaco                                        | 342          | South America             | 2,492.5                            | 21.3                   | 23.9                                                 | 4,854,160                                                  | 0.465                                                            | 589,887.2                                      | 147                                  | -22.33                 | 8511.4                                                           |
| Magdalena - Sinu                             | 302          | South America             | 3,306.6                            | 23.1                   | 65.7                                                 | 49,340,800                                                 | 1.015                                                            | 301,018.7                                      | 182                                  | 6.78                   | 16595.9                                                          |
| Amazonas Guiana Shield                       | 315          | South America             | 904.1                              | 26.1                   | 66.9                                                 | 1,052,380                                                  | 0.787                                                            | 563,331.9                                      | 430                                  | 1.17                   | 21379.6                                                          |
| S. Francisco                                 | 327          | South America             | 1,202.9                            | 23.9                   | 45.1                                                 | 19,966,000                                                 | 0.415                                                            | 635,926.9                                      | 180                                  | -13.38                 | 22908.7                                                          |
| Western Amazon Piedmont                      | 313          | South America             | 5,104.5                            | 24.5                   | 56.0                                                 | 2,638,980                                                  | 0.964                                                            | 246,373.5                                      | 548                                  | -0.96                  | 20417.4                                                          |
| Lower Uruguay                                | 332          | South America             | 4,430.7                            | 19.1                   | 8.2                                                  | 3,974,780                                                  | 0.919                                                            | 270,455.7                                      | 230                                  | -30.64                 | 22908.7                                                          |
| Xingu                                        | 322          | South America             | 1,888.6                            | 25.2                   | 58.9                                                 | 633,293                                                    | 0.789                                                            | 481,740.6                                      | 143                                  | -8.67                  | 32359.4                                                          |
| Upper Parana                                 | 344          | South America             | 4,609.7                            | 22.2                   | 31.3                                                 | 70,014,800                                                 | 0.771                                                            | 827,360.9                                      | 257                                  | -21.06                 | 33884.4                                                          |



| ECOREGION                            | Ecoregion ID | Continent     | Summed Catch (T yr <sup>-1</sup> ) | Mean Temp* (Degrees C) | Mean Radiation <sup>†</sup> (Watts m <sup>-2</sup> ) | Summed Population <sup>‡</sup> (Persons km <sup>-2</sup> ) | Mean NPP <sup>§</sup> (Kg-C m <sup>-2</sup> year <sup>-1</sup> ) | Ecoregion Area¶ (km <sup>2</sup> ) | Total Species Richness¶ | Mean Latitude (Degree) | Summed Mean Annual Discharge (km <sup>3</sup> yr <sup>-1</sup> ) |
|--------------------------------------|--------------|---------------|------------------------------------|------------------------|------------------------------------------------------|------------------------------------------------------------|------------------------------------------------------------------|------------------------------------|-------------------------|------------------------|------------------------------------------------------------------|
| Tapajos - Juruena                    | 320          | South America | 2,021.1                            | 25.5                   | 59.3                                                 | 1,088,300                                                  | 0.809                                                            | 449,782.9                          | 244                     | -10.12                 | 33884.4                                                          |
| Mamore - Madre de Dios Piedmont      | 318          | South America | 11,096.7                           | 25.3                   | 43.7                                                 | 3,931,550                                                  | 0.886                                                            | 409,221.5                          | 462                     | -13.43                 | 36307.8                                                          |
| Orinoco Guiana Shield                | 308          | South America | 6,710.8                            | 23.4                   | 75.4                                                 | 1,178,160                                                  | 0.900                                                            | 301,295.6                          | 637                     | 5.16                   | 33113.1                                                          |
| Tocantins - Araguaia                 | 324          | South America | 3,128.7                            | 25.5                   | 53.6                                                 | 6,251,890                                                  | 0.668                                                            | 762,552.8                          | 346                     | -11.35                 | 51286.1                                                          |
| Orinoco Delta & Coastal Drainages    | 309          | South America | 9,054.5                            | 26.3                   | 57.4                                                 | 2,070,870                                                  | 0.665                                                            | 110,486.9                          | 314                     | 8.68                   | 32359.4                                                          |
| Madeira Brazilian Shield             | 321          | South America | 3,741.9                            | 26.2                   | 62.6                                                 | 1,954,150                                                  | 0.851                                                            | 364,797.8                          | 214                     | -9.25                  | 46773.5                                                          |
| Lower Parana                         | 345          | South America | 37,527.1                           | 19.2                   | 10.9                                                 | 30,235,100                                                 | 0.680                                                            | 643,174.7                          | 331                     | -29.36                 | 87096.4                                                          |
| Orinoco Llanos                       | 307          | South America | 24,841.7                           | 27.2                   | 65.2                                                 | 4,772,790                                                  | 0.792                                                            | 465,952.5                          | 809                     | 6.07                   | 93325.4                                                          |
| Rio Negro                            | 314          | South America | 15,217.2                           | 26.2                   | 71.1                                                 | 2,522,260                                                  | 0.966                                                            | 496,621.0                          | 668                     | 0.17                   | 151356.1                                                         |
| Amazonas Estuary & Coastal Drainages | 323          | South America | 32,150.9                           | 26.7                   | 63.1                                                 | 13,323,700                                                 | 0.754                                                            | 566,418.5                          | 244                     | -2.61                  | 316227.8                                                         |
| Amazonas Lowlands                    | 316          | South America | 191,014.0                          | 26.2                   | 66.3                                                 | 6,487,310                                                  | 0.924                                                            | 1,911,772.3                        | 911                     | -4.95                  | 1202264.4                                                        |

**Footnotes**

\*Data downloaded from <http://atlas.wisc.sage.edu/>; 1961-1990 time frame.

†Data downloaded from [http://earthobservatory.nasa.gov/GlobalMaps/view.php?d1=CERES\\_NETFLUX\\_M](http://earthobservatory.nasa.gov/GlobalMaps/view.php?d1=CERES_NETFLUX_M): 2010.

‡Data downloaded from Global Population of the World ([sedac.ciesin.columbia.edu/data/collection/gpw-v3](http://sedac.ciesin.columbia.edu/data/collection/gpw-v3)); 2010.

§Data downloaded from <http://atlas.wisc.sage.edu/>.

¶Data downloaded from Freshwater Ecoregions of the World ([www.feow.org](http://www.feow.org)).
